# Supplementary material
Source: PubMed Central journal article supplement (PMC4057896)
Supplement: NIHMS580483-supplement-01.pdf [file NIHMS580483-supplement-01.pdf]

**Supplementary information to:**

**The cleaved N-terminus of pVI binds peripentonal hexons in mature adenovirus.**

Joost Snijder<sup>1,2</sup>, Marco Benevento<sup>1,2</sup>, Crystal L. Moyer<sup>3</sup>, Vijay Reddy<sup>4</sup>, Glen R. Nemerow<sup>3\*</sup>,

Albert J.R. Heck<sup>1,2\*</sup>

## Supplementary Tables.

**Supplementary Table S1.** Peptide identifications of pVIn from LC-MS/MS analysis of mature HAdV virions. The confidence of the identification is given by the IonScore. The higher the score, the more confident the identification. Scores of >20 are considered confident.

| <b>start</b> | <b>end</b> | <b>Sequence</b>       | <b>Modifications</b>          | <b>IonScore</b> |
|--------------|------------|-----------------------|-------------------------------|-----------------|
| 1            | 12         | mEDINFASLAPR          | N-Term(Acetyl)                | 105             |
| 1            | 12         | mEDINFASLAPR          | N-Term(Acetyl); M1(Oxidation) | 97              |
| 13           | 33         | HGSRPFmGNWQDIGTSNmSGG | M7(Oxidation); M18(Oxidation) | 55              |
| 13           | 33         | HGSRPFmGNWQDIGTSNMSGG | M7(Oxidation)                 | 62              |
| 13           | 33         | HGSRPFmGNWQDIGTSNMSGG |                               | 46              |

**Supplementary Table S2.** PSM based quantitation of pVIn release upon heating. The fraction of released pVIn is calculated as the average  $\pm$  standard deviation from triplicate experiments, where for each experiment the number of PSM's, normalized to the PSM's for pVII, is divided by the average pVII-normalized number of pVIn PSM's in untreated virus.

| <b>condition</b> | <b>protein</b> | <b>number of PSMs</b>    |                           | <b>n</b> |
|------------------|----------------|--------------------------|---------------------------|----------|
|                  |                | <b>average</b>           | <b>standard deviation</b> |          |
| untreated        | pVII           | 82.3                     | 5.0                       | 6        |
|                  | pVIn           | 23.5                     | 2.7                       |          |
| heated           | pVII           | 104.0                    | 1.7                       | 3        |
|                  | pVIn           | 5.7                      | 0.6                       |          |
|                  |                | <b>fraction released</b> |                           |          |
|                  |                | <b>average</b>           | <b>standard deviation</b> |          |
|                  |                | 0.81                     | 0.02                      |          |

**Supplementary Table S3.** Hexon-pVIn masses obtained from native MS analysis.

|                                      | <b>mass (kDa)</b> |                           | <b>error % (compared to theoretical)</b> |
|--------------------------------------|-------------------|---------------------------|------------------------------------------|
|                                      | <b>average</b>    | <b>standard deviation</b> |                                          |
| hexon <sub>3</sub>                   | 323.62            | 0.01                      | 0.024                                    |
| hexon <sub>3</sub> pVIn <sub>1</sub> | 327.24            | 0.02                      | 0.021                                    |
| hexon <sub>3</sub> pVIn <sub>2</sub> | 330.87            | 0.01                      | 0.022                                    |
| hexon <sub>3</sub> pVIn <sub>3</sub> | 334.49            | 0.01                      | 0.022                                    |
| pVIn                                 | 3.624             | 0.00                      | 0.002                                    |

## Supplementary Figures.

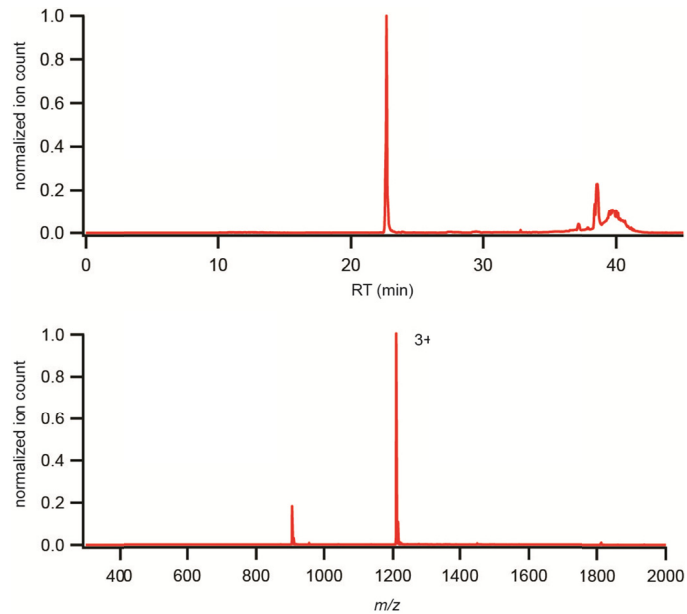

**Supplementary Figure S1.** LC-MS analysis of isolated peptide from heat-released hexon trimers. A single peptide is recovered from the isolation procedure as evidenced from the base-peak chromatogram (*top*). The isolated peptide has a mass of 3624.09 Da, compared to a theoretical mass of 3624.01 for pVIn.

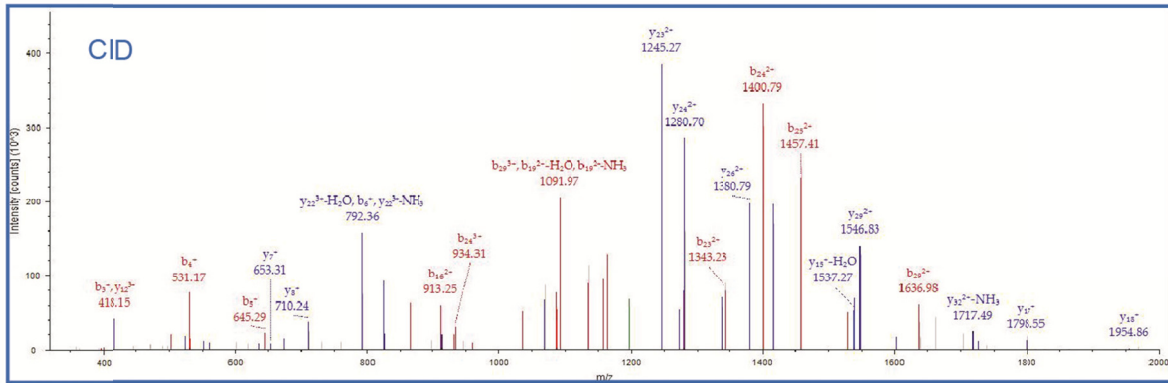

**Ac-MEDINFASLAPRHGSRPFMGNWQDIGTSNMSGG**

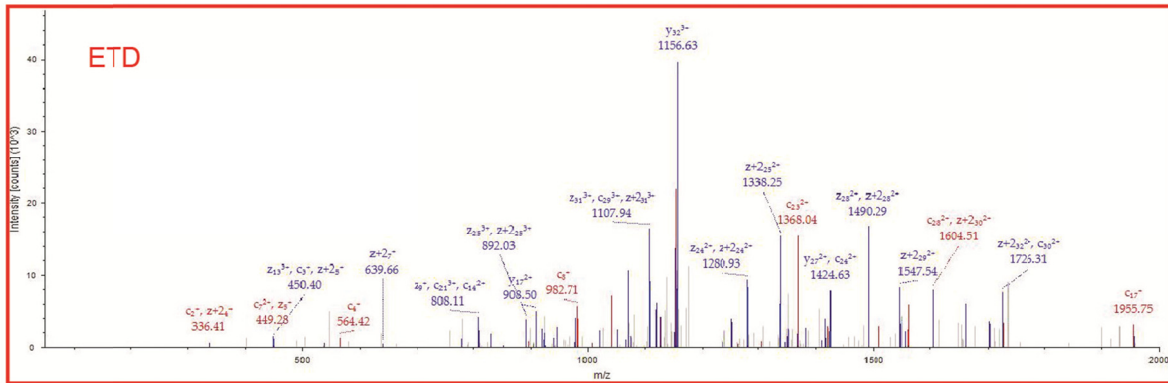

**Supplementary Figure S2.** MS/MS analysis of the peptide isolated from the hexon complex. A combination of CID and ETD fragmentation covers the full sequence of the peptide and confirms that the peptide is pVIn.

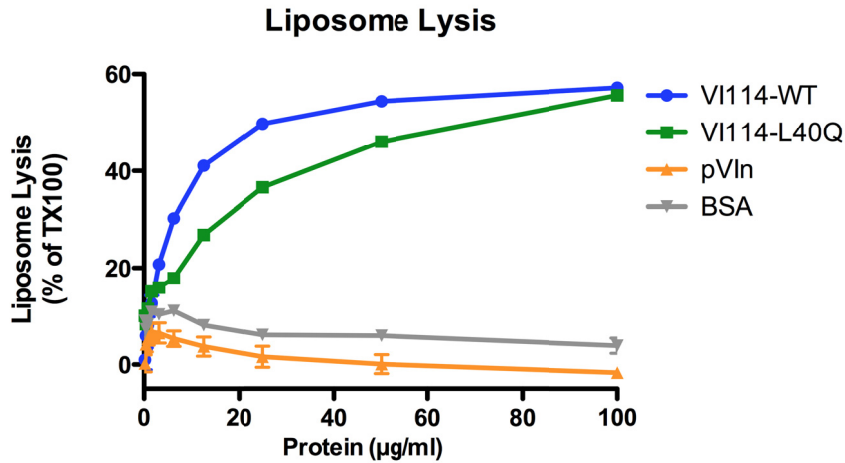

**Supplementary Figure S3.** pVIn has no membrane lytic activity. Fluorescence measurements of SulfoB release from liposomes. Lytic activity is expressed as % of total fluorescence for Triton-X100 disrupted liposomes. Points represent the average  $\pm$  SEM from triplicate measurements.

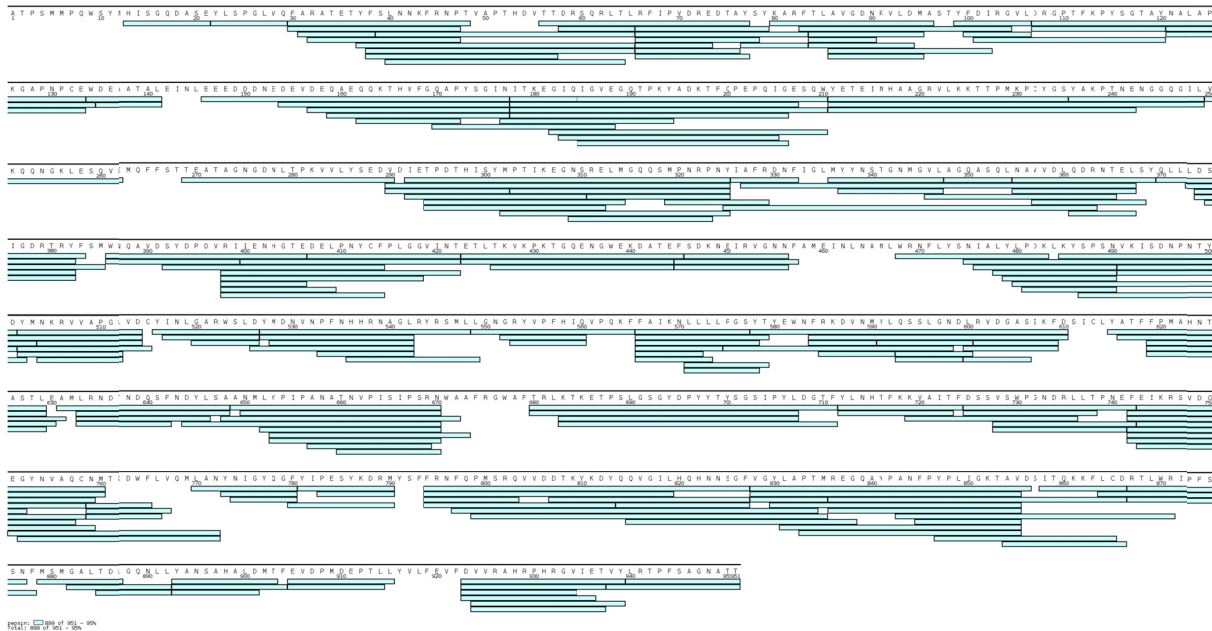

**Supplementary Figure S4.** Sequence coverage of hexon from peptide ID's of the HDX-MS experiment.

affected by pVln binding

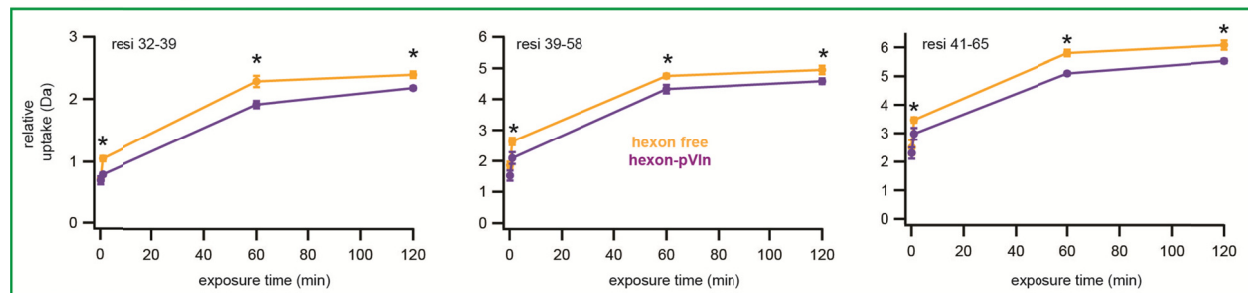

selected representative peptides, not affected by pVln binding

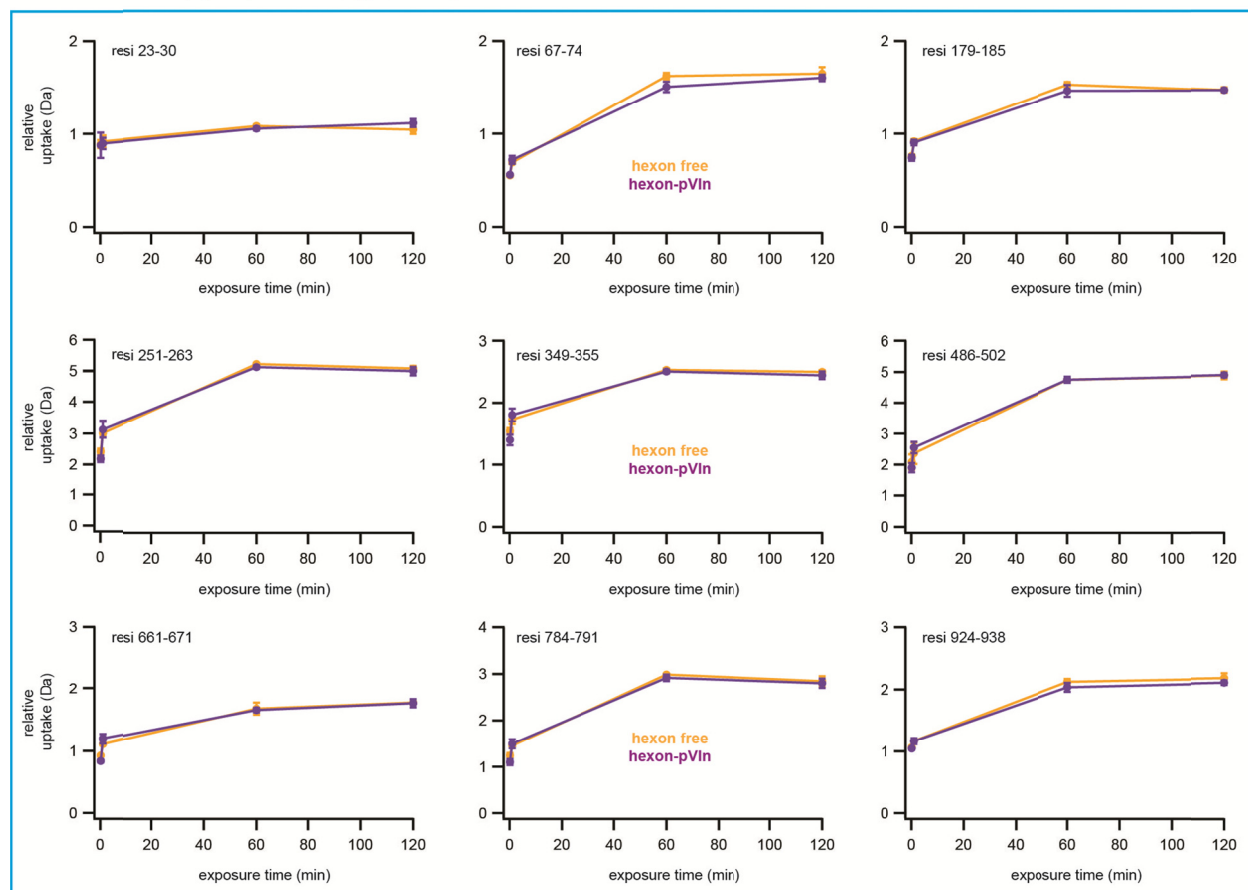

**Supplementary Figure S5.** Comparison of peptides that exhibit protection for deuterium uptake upon pVln binding (green box) with selected representative peptides that were unaffected by pVln binding (blue box). Asterisks indicate that  $p < 0.05$  in unpaired, two-tailed Student's  $t$ -tests.
